# Supplementary material for: Time to death and its predictors among neonates admitted with sepsis in neonatal intensive care unit at comprehensive specialized hospitals in Northeast Ethiopia
Source: Frontiers journal article supplement (doi:10.3389/fped.2024.1366363), 2024-04-17
Supplement: Data_Sheet_1.PDF [file Data_Sheet_1.PDF]

| <b>PART I. Sociodemographic factors</b>         |                                                                                        |                                                                                                |                     |
|-------------------------------------------------|----------------------------------------------------------------------------------------|------------------------------------------------------------------------------------------------|---------------------|
| No.                                             | Question                                                                               | Response                                                                                       | Skip                |
| 101                                             | Age of mothers                                                                         | -----                                                                                          |                     |
| 102                                             | Place of residence                                                                     | 1. Urban 2. Rural                                                                              |                     |
| 103                                             | Educational status                                                                     | 1.unable to read and write<br>2. primary school<br>3. secondary school<br>4.Tertiary education |                     |
| 104                                             | Occupation status                                                                      | 1.Housewife<br>2. Private work<br>3. Civil servant<br>4. others                                |                     |
| <b>PART II. Maternal health-related factors</b> |                                                                                        |                                                                                                |                     |
| 105                                             | Gravidity                                                                              |                                                                                                |                     |
| 106                                             | Parity                                                                                 |                                                                                                |                     |
| 107                                             | Did the mother have an ANC follow-up for indexed neonate?                              | 1. Yes 2. No                                                                                   | If 'no' skip to 109 |
| 108                                             | If yes, what number of ANC visits?                                                     | times                                                                                          |                     |
| 109                                             | Did the mother have history of fever during your pregnancy of this neonate?            | 1. Yes<br>2. No                                                                                |                     |
| 110                                             | Onset of labour                                                                        | 1. spontaneous 2. induced                                                                      |                     |
| 111                                             | How long was the duration of labor?                                                    | ----- hours                                                                                    |                     |
| 112                                             | Where did you deliver your child?                                                      | 1. Home<br>2. Heath center<br>3. Hospital                                                      |                     |
| 113                                             | What was the mode of delivery?                                                         | 1. SVD<br>2. Assisted delivery<br>3. C/S                                                       |                     |
| 114                                             | PROM                                                                                   | 1. Yes<br>2. No                                                                                |                     |
| 115                                             | Duration of rupture of membrane                                                        | 1. -----hours<br>2. Not ruptured                                                               |                     |
| 116                                             | Did the amniotic fluid was foul smelling                                               | 1. Yes<br>2. No                                                                                |                     |
| 117                                             | Did you have a history of UTI/STI during your pregnancy with this neonate? (VDRL test) | 1. Yes<br>2. No<br>3. unknown                                                                  |                     |
| 118                                             | HIV test                                                                               | 1. Yes<br>2. No<br>3. unknown                                                                  |                     |
| 119                                             | Hepatitis test                                                                         | 1. Yes<br>2. No<br>3. unknown                                                                  |                     |
| 120                                             | Pregnancy-induced HTN during pregnancy                                                 | 1. Yes<br>2.No                                                                                 |                     |

|     |                                      |                |  |
|-----|--------------------------------------|----------------|--|
| 121 | Presence of maternal chronic illness | 1. Yes<br>2.No |  |
| 122 | Placental abnormality                | 1. Yes<br>2.No |  |

| <b>PART III: neonatal related factors</b> |                                                                   |                    |  |
|-------------------------------------------|-------------------------------------------------------------------|--------------------|--|
| 123                                       | Sex of the neonate                                                | 1. Male 2. Female  |  |
| 124                                       | Age of neonate                                                    | ----- days         |  |
| 125                                       | Gestational age at birth                                          | ----- weeks        |  |
| 126                                       | Weight of the neonate at birth in gram                            | ----- gm           |  |
| 127                                       | End of follow up weight                                           | ----- gm           |  |
| 128                                       | Does the neonate was asphyxiated?                                 | 1. Yes 2. No       |  |
| 129                                       | Did the neonate was resuscitated?                                 | 1. Yes 2. No       |  |
| 130                                       | APGAR score at 1 <sup>st</sup> minute and 5 <sup>th</sup> minutes | -----/10, -----/10 |  |

| <b>PART IV: Clinical criteria for the diagnosis of neonatal sepsis from observation/ chart review</b> |                                                |                          |                                 |
|-------------------------------------------------------------------------------------------------------|------------------------------------------------|--------------------------|---------------------------------|
|                                                                                                       |                                                | <b>Admission profile</b> | <b>End of follow up profile</b> |
| 131                                                                                                   | Convulsions/seizure                            | Yes _____ No _____       | Yes _____ No _____              |
| 132                                                                                                   | Respiratory rate > 60 breaths/min              | Yes _____ No _____       | Yes _____ No _____              |
| 133                                                                                                   | Oxygen saturation                              | 1.< 90% 2. ≥ 90%         | 1.< 90% 2. ≥ 90%                |
| 134                                                                                                   | Respiratory distress syndrome                  | Yes _____ No _____       | Yes _____ No _____              |
| 135                                                                                                   | Heart rate                                     | _____                    | _____                           |
| 136                                                                                                   | Redness around umbilicus extending to the skin | Yes _____ No _____       | Yes _____ No _____              |
| 137                                                                                                   | Temperature >37.7°C or <35.5°C                 | _____                    | _____                           |
| 138                                                                                                   | Lethargic or unconscious                       | Yes _____ No _____       | Yes _____ No _____              |
| 139                                                                                                   | Reduced movements                              | Yes _____ No _____       | Yes _____ No _____              |
| 140                                                                                                   | Not able to breast feed                        | Yes _____ No _____       | Yes _____ No _____              |
| 141                                                                                                   | Hypoglycemia                                   | Yes _____ No _____       | Yes _____ No _____              |
| 142                                                                                                   | Jaundice                                       | Yes _____ No _____       | Yes _____ No _____              |
| 143                                                                                                   | MAS                                            | Yes _____ No _____       | Yes _____ No _____              |

|                                                                         |                                                       |                                                                                                                           |                                                                                       |
|-------------------------------------------------------------------------|-------------------------------------------------------|---------------------------------------------------------------------------------------------------------------------------|---------------------------------------------------------------------------------------|
| 144                                                                     | Bulging fontanel                                      | Yes _____ No _____                                                                                                        | Yes _____ No _____                                                                    |
| <b>PART V: Laboratory findings for the diagnosis of neonatal sepsis</b> |                                                       |                                                                                                                           |                                                                                       |
| N.o                                                                     | Type of laboratory finding                            |                                                                                                                           | range                                                                                 |
| 145                                                                     | CBC profile WBC count                                 | _____                                                                                                                     | 1. < 5000<br>2. 5000-20000<br>3. > 20,000                                             |
| 146                                                                     | Platelet count(cell/mm3)                              | _____                                                                                                                     | 1. <150 × 10 <sup>3</sup><br>2. 150–450 × 10 <sup>3</sup><br>3. 450 × 10 <sup>3</sup> |
| 147                                                                     | Hemoglobin/Hgb mg/dl                                  | _____                                                                                                                     |                                                                                       |
| 148                                                                     | Random blood sugar                                    |                                                                                                                           |                                                                                       |
| 149                                                                     | Gram stain                                            | 1. Yes      2. No                                                                                                         | 1. Positive<br>2. Negative                                                            |
| 150                                                                     | CSF analysis                                          | 1. Yes      2. No                                                                                                         | 1.Positive indicator<br>2. No indicator                                               |
| 151                                                                     | Type of sepsis diagnosed                              | 1. EONS      2. LONS                                                                                                      |                                                                                       |
| 152                                                                     | Associated infection/ birth injury or other diagnosis | a) Meningitis                                                                                                             | 1. Yes   2. No                                                                        |
|                                                                         |                                                       | b) PNA                                                                                                                    | 1. Yes   2. No                                                                        |
|                                                                         |                                                       | c) Septic shock                                                                                                           | 1. Yes   2. No                                                                        |
|                                                                         |                                                       | d) Congenital anomalies                                                                                                   | 1. Yes   2. No                                                                        |
|                                                                         |                                                       | e) NEC                                                                                                                    | 1. Yes   2. No                                                                        |
|                                                                         |                                                       | f) Other ---- (specify)                                                                                                   |                                                                                       |
| <b>PART VI: Treatment pattern and its outcome</b>                       |                                                       |                                                                                                                           |                                                                                       |
| 153                                                                     | NG tube feeding                                       | 1.Yes      2. No                                                                                                          |                                                                                       |
| 154                                                                     | Respiratory help                                      | 1.Yes      2. No                                                                                                          |                                                                                       |
| 155                                                                     | Is 'yes', the type of respiratory help                | 1. INO <sub>2</sub><br>2. CPAP<br>3. Other -----(specify)                                                                 |                                                                                       |
| 156                                                                     | Is the child on phototherapy                          | 1. Yes      2. No                                                                                                         |                                                                                       |
| 157                                                                     | Iv-line medication                                    | a) Ampicillin + gentamycin<br>b) Ampicillin + ceftriaxone<br>c) Cefatoxime + gentamycin<br>d) Vancomycin                  |                                                                                       |
| 158                                                                     | Co-administered drug along with antibiotics           | a) PCM suppository<br>b) Calcium gluconate<br>c) Maintenance fluid 10%<br>d) Phenytoin or phenobarbitone<br>f) other..... |                                                                                       |

|     |                           |                                                                                                                                                                                                       |
|-----|---------------------------|-------------------------------------------------------------------------------------------------------------------------------------------------------------------------------------------------------|
| 159 | Duration of hospital stay | ..... days                                                                                                                                                                                            |
| 160 | Outcome after admission   | <ol style="list-style-type: none"><li>1. Improved</li><li>2. Develop complication/ disability</li><li>3. Death</li><li>4. Referral/ transfer in</li><li>5. Refuse against medical treatment</li></ol> |
